# Supplementary material for: The microfluidic nebulator: production of sub-micrometer sized airborne drops
Source: Royal Society of Chemistry journal article supplement (doi:10.1039/c6lc01455k), 2017-01-01
Supplement: c6lc01455k3.pdf [file c6lc01455k3.pdf]

**Supporting information to "The microfluidic nebulator: Production of sub-micrometer sized airborne drops"**

Esther Amstad,<sup>1,2</sup> Frans Spaepen,<sup>1</sup> Michael P. Brenner,<sup>1</sup> David A. Weitz<sup>1,3</sup>

<sup>1</sup> School of Engineering and Applied Sciences, Harvard University,  
Massachusetts 02138, USA

<sup>2</sup> Institute of Materials, Ecole Polytechnique Fédérale de Lausanne (EPFL),  
Switzerland

<sup>3</sup> Department of Physics, Harvard University, Massachusetts 02138, USA

## Estimation of the air flow profile

To test if we can estimate the flow profile in the nebulator using the Poiseuille law, we estimate the flow in each channel section using this equation and the channel dimensions summarized in Table S1. To quantify the pressure drop between each main channel section, we measure the pressure-dependent expansion of a closed PDMS-channel as a function of the pressure applied to the air inlet. We convert this expansion into pressures using the calibration curve shown in Figure S1. The results are shown in Figure 3b of the main paper.

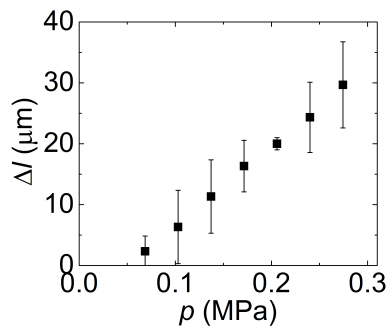

**Figure S1:** Calibration curve measured in closed 100  $\mu\text{m}$  diameter, 100  $\mu\text{m}$  tall PDMS channels as a function of the pressure applied to the air inlet.

**Table S1:** Length,  $L$ , width,  $w$ , and height,  $h$ , and hydrodynamic resistance,  $R$ , of the different channel sections.

|    | $L$ ( $\mu\text{m}$ ) | $w$ ( $\mu\text{m}$ ) | $h$ ( $\mu\text{m}$ ) | $R$ (Ns/m)            |
|----|-----------------------|-----------------------|-----------------------|-----------------------|
| I1 | 9322                  | 200                   | 100                   | $1.62 \times 10^{10}$ |
| I2 | 12320                 | 200                   | 100                   | $2.14 \times 10^{10}$ |
| I3 | 16160                 | 200                   | 100                   | $2.81 \times 10^{10}$ |
| I4 | 19980                 | 200                   | 100                   | $3.47 \times 10^{10}$ |
| I5 | 23005                 | 200                   | 100                   | $4.00 \times 10^{10}$ |
| I6 | 24260                 | 200                   | 100                   | $4.15 \times 10^9$    |
| M1 | 350                   | 40                    | 100                   | $1.74 \times 10^{10}$ |
| M2 | 200                   | 80                    | 100                   | $1.87 \times 10^9$    |
| M3 | 200                   | 80                    | 100                   | $1.87 \times 10^9$    |
| M4 | 200                   | 80                    | 100                   | $1.87 \times 10^9$    |
| M5 | 920                   | 80                    | 100                   | $8.62 \times 10^9$    |
| M6 | 50000                 | 80                    | 300                   | $9.31 \times 10^{10}$ |

### **Quantification of the sizes of spray-dried CaCO<sub>3</sub> particles and the secondary drops they are produced in**

We quantify the size and size distribution of spray-dried CaCO<sub>3</sub> particles from SEM images. A summary of the particle diameters is shown in Table S2.

From these data, we calculated the size distribution of secondary drops using the known initial salt concentrations and a CaCO<sub>3</sub> × 2 NaCl density of 2.34 g/cm<sup>3</sup>, as summarized in Table S3.

**Table S2:** Summary of the size distribution of spray-dried CaCO<sub>3</sub> particles

| particle diameter (nm) | number of particles |
|------------------------|---------------------|
| 2 to 4                 | 22                  |
| 4 to 6                 | 34                  |
| 6 to 8                 | 38                  |
| 8 to 10                | 65                  |
| 10 to 12               | 110                 |
| 12 to 14               | 81                  |
| 14 to 16               | 61                  |
| 16 to 18               | 29                  |
| 18 to 20               | 16                  |
| 20 to 22               | 16                  |

**Table S3:** Summary of the calculated size distribution of secondary drops produced at a pressure at the air inlets of 0.28 MPa.

| drop diameter (nm) | number of drops |
|--------------------|-----------------|
| 20 to 60           | 20              |
| 60 to 100          | 36              |
| 100 to 140         | 42              |
| 140 to 180         | 86              |
| 180 to 220         | 146             |
| 220 to 260         | 81              |
| 260 to 300         | 33              |
| 300 to 340         | 17              |
| 340 to 380         | 11              |
